# Supplementary material
Source: PubMed Central journal article supplement (PMC5589791)
Supplement: supp_WNL.0000000000004330_Supplemental_Data.pdf [file supp_WNL.0000000000004330_Supplemental_Data.pdf]

## Supplement

**Table e-1: Included patients by centre**

| <b>MSBase centre</b>                                    | <b>Patients, n</b> |
|---------------------------------------------------------|--------------------|
| Hospital Universitario Virgen Macarena, Spain           | 263                |
| Ospedale Clinizzato "Ss. Annunziata", Italy             | 260                |
| General University Hospital in Prague, Czech Republic   | 252                |
| University of Bari, Italy                               | 206                |
| CHUM - Hopital Notre Dame, Canada                       | 180                |
| Neuro Rive-Sud, Canada                                  | 113                |
| Orbis Medical Center The Netherlands                    | 95                 |
| Hotel Dieu de Lévis, Canada                             | 83                 |
| The Royal Melbourne Hospital, Australia                 | 79                 |
| ASUR Marche, Italy                                      | 62                 |
| Box Hill Hospital, Australia                            | 60                 |
| Karadeniz Technical University, Turkey                  | 53                 |
| Nuovo Ospedale Civile S. Agostino/Estense, Italy        | 52                 |
| AORN San Giuseppe Moscati, Italy                        | 51                 |
| John Hunter Hospital, Australia                         | 46                 |
| Medical Faculty, 19 Mayıs University, Turkey            | 46                 |
| Cliniques Universitaires Saint-Luc, Belgium             | 39                 |
| Mondino National Neurological Institute of Pavia, Italy | 33                 |
| Ospedali Riuniti di Salerno, Italy                      | 32                 |
| Hospital Universitario Virgen de Valme, Spain           | 31                 |
| Hospital Germans Trias i Pujol, Spain                   | 31                 |

|                                                      |    |
|------------------------------------------------------|----|
| University of Parma, Italy                           | 30 |
| Hospital São João, Portugal                          | 30 |
| University Hospital San Carlos, Spain                | 24 |
| CIREN, Cuba                                          | 22 |
| Groene Hart Ziekenhuis, The Netherlands              | 18 |
| Flinders Medical Centre, Australia                   | 17 |
| University Hospital Nijmegen, The Netherlands        | 15 |
| St Andrews Place, Australia                          | 14 |
| Hospital Universitario Donostia, Spain               | 13 |
| Ineba, Argentina                                     | 11 |
| University of Florence, Italy                        | 11 |
| Amiri Hospital                                       | 11 |
| Hospital Italiano, Argentina                         | 10 |
| Hospital Fernandez, Argentina                        | 9  |
| Hospital de Galdakao-Usansolo, Spain                 | 9  |
| Liverpool Hospital, Australia                        | 8  |
| Assaf Harofeh Medical Center, Israel                 | 8  |
| Jewish General Hospital, Canada                      | 7  |
| Kommunehospitalet, Denmark                           | 5  |
| Nemocnice Jihlava, Czech Republic                    | 4  |
| Craigavon Area Hospital, United Kindom               | 4  |
| The Alfred Hospital, Australia                       | 3  |
| University of Debrecen, Hungary                      | 3  |
| Bombay Hospital Institute of Medical Sciences, India | 3  |

|                                                           |   |
|-----------------------------------------------------------|---|
| Franciscus Ziekenhuis, The Netherlands                    | 3 |
| Central Clinical Emergency Military Hospital, Romania     | 3 |
| Westmead Hospital, Australia                              | 2 |
| Hospital Ecoville, Brazil                                 | 2 |
| CSSS Saint-Jérôme, Canada                                 | 2 |
| South Eastern Trust, United Kingdom                       | 2 |
| Jahn Ferenc Teaching Hospital, Hungary                    | 2 |
| Istanbul University Cerrahpasa School of Medicine, Turkey | 2 |
| Sir Charles Gairdner Hospital, Australia                  | 1 |
| BMRI, Australia                                           | 1 |
| St Vincents Hospital, Australia                           | 1 |
| Hospital Sirio-Libanes, Brazil                            | 1 |
| Veszprém Megyei Csolnoky Ferenc Kórház , Hungary          | 1 |
| Clinic of Neurology, Macedonia                            | 1 |
| Mater Dei Hospital, Malta                                 | 1 |

**Table e-2: Logistic model used to determine the propensity scores**

| <b>Independent variable</b>                                   | <b>Coefficient</b> | <b>p-value</b> |
|---------------------------------------------------------------|--------------------|----------------|
| Male patient sex                                              | -0.07              | 0.47           |
| Age at baseline                                               | -0.03              | <0.01          |
| Disease duration at baseline                                  | -0.05              | <0.01          |
| Disability at baseline                                        | -0.04              | 0.66           |
| Disability change immediately preceding the diagnosis of SPMS | 0.02               | 0.72           |
| Pre-baseline disability trajectory                            | -7.35              | <0.01          |
| Relapses in the year before baseline                          | 3.97               | <0.01          |
| ARR during follow-up                                          | 3.64               | 0.02           |
| Centre AU-009                                                 | -0.63              | 0.04           |
| Centre CA-007                                                 | -1.06              | <0.01          |
| Centre CA-010                                                 | -1.11              | <0.01          |
| Centre CU-001                                                 | -3.60              | <0.01          |
| Centre ES-012                                                 | -1.69              | <0.01          |
| Centre IT-002                                                 | -0.63              | <0.01          |
| Centre IT-008                                                 | -1.28              | <0.01          |
| Centre IT-014                                                 | -1.52              | <0.01          |
| Centre NL-001                                                 | -1.57              | <0.01          |
| Centre NL-003                                                 | -1.09              | <0.01          |

Only centre variables with significant contribution to the logistic model are shown. Coefficients indicate change in log odds of being treated at conversion to secondary progressive multiple sclerosis.

ARR = Annualized relapse rate; SPMS = secondary progressive multiple sclerosis

**Figure e-1: Propensity scores**

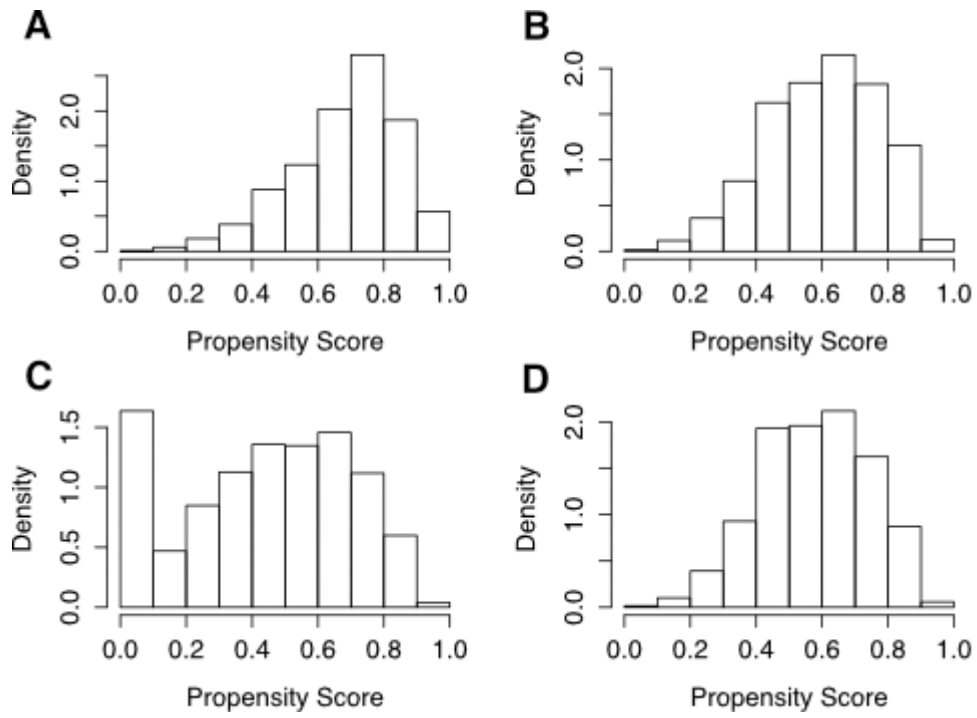

Propensity scores before (A,C) and after (B,D) matching among patients receiving (A,B) and not receiving with anti-inflammatory treatment (C,D).
